# Supplementary material for: Structure and replication of Pseudomonas aeruginosa phage JBD30
Source: PubMed Central journal article supplement (PMC11445458; doi:10.1038/s44318-024-00195-1), 2024-08-14
Supplement: 44318_2024_195_MOESM1_ESM.pdf [file 44318_2024_195_MOESM1_ESM.pdf]

# Supplementary Materials for

## Structure and replication of *Pseudomonas aeruginosa* phage JBD30

Lucie Valentová<sup>1</sup>, Tibor Füzik<sup>1</sup>, Jiří Nováček<sup>1</sup>, Zuzana Hlavenková<sup>1</sup>, Jakub Pospíšil<sup>1</sup>, and Pavel Plevka<sup>1</sup>

<sup>1</sup> – Central European Institute of Technology, Masaryk University, Brno, Czech Republic

& – corresponding author: pavel.plevka@ceitec.muni.cz

### This file includes:

|                      |                                                                                                    |    |
|----------------------|----------------------------------------------------------------------------------------------------|----|
| Appendix Figure S1.  | FSC curves of cryo-EM reconstructions.                                                             | 2  |
| Appendix Figure S2.  | Local resolution maps of cryo-EM reconstructions.                                                  | 4  |
| Appendix Figure S3.  | Characterization of protein composition of JBD30 virion.                                           | 5  |
| Appendix Figure S4.  | Packaging of dsDNA inside capsid of JBD30 virion.                                                  | 6  |
| Appendix Figure S5.  | Electrostatic charge distribution of JBD30 connector and tail-forming protein oligomers.           | 7  |
| Appendix Figure S6.  | JBD30 baseplate and its comparison with that of bacteriophage T5.                                  | 8  |
| Appendix Figure S7.  | Translocation of phage JBD30 to <i>P. aeruginosa</i> cell surface is inhibited by low temperature. | 9  |
| Appendix Figure S8.  | JBD30 tape measure protein <i>gp46</i> .                                                           | 10 |
| Appendix Figure S9.  | One-step growth curve of phage JBD30 propagated on <i>P. aeruginosa</i> strain BAA-28.             | 11 |
| Appendix Figure S10. | Expression of type IV pili by <i>P. aeruginosa</i> cells.                                          | 12 |
| Appendix Figure S11. | Replication cycle of bacteriophage JBD30 visualized using lattice SIM fluorescence microscopy.     | 13 |
| Appendix Figure S12. | Effect of DAPI labelling on phage JBD30 viability.                                                 | 14 |
| Appendix Figure S13. | Lattice SIM fluorescence microscopy of <i>P. aeruginosa</i> cells infected by DAPI-labelled JBD30. | 15 |
| Appendix Table S1.   | Complete list of JBD30 encoded genes.                                                              | 17 |
| Appendix Table S2.   | Data collection and structure quality indicators.                                                  | 19 |
| Appendix Table S3.   | Homologues of selected JBD30 structural proteins.                                                  | 20 |

17 **Supplementary figures**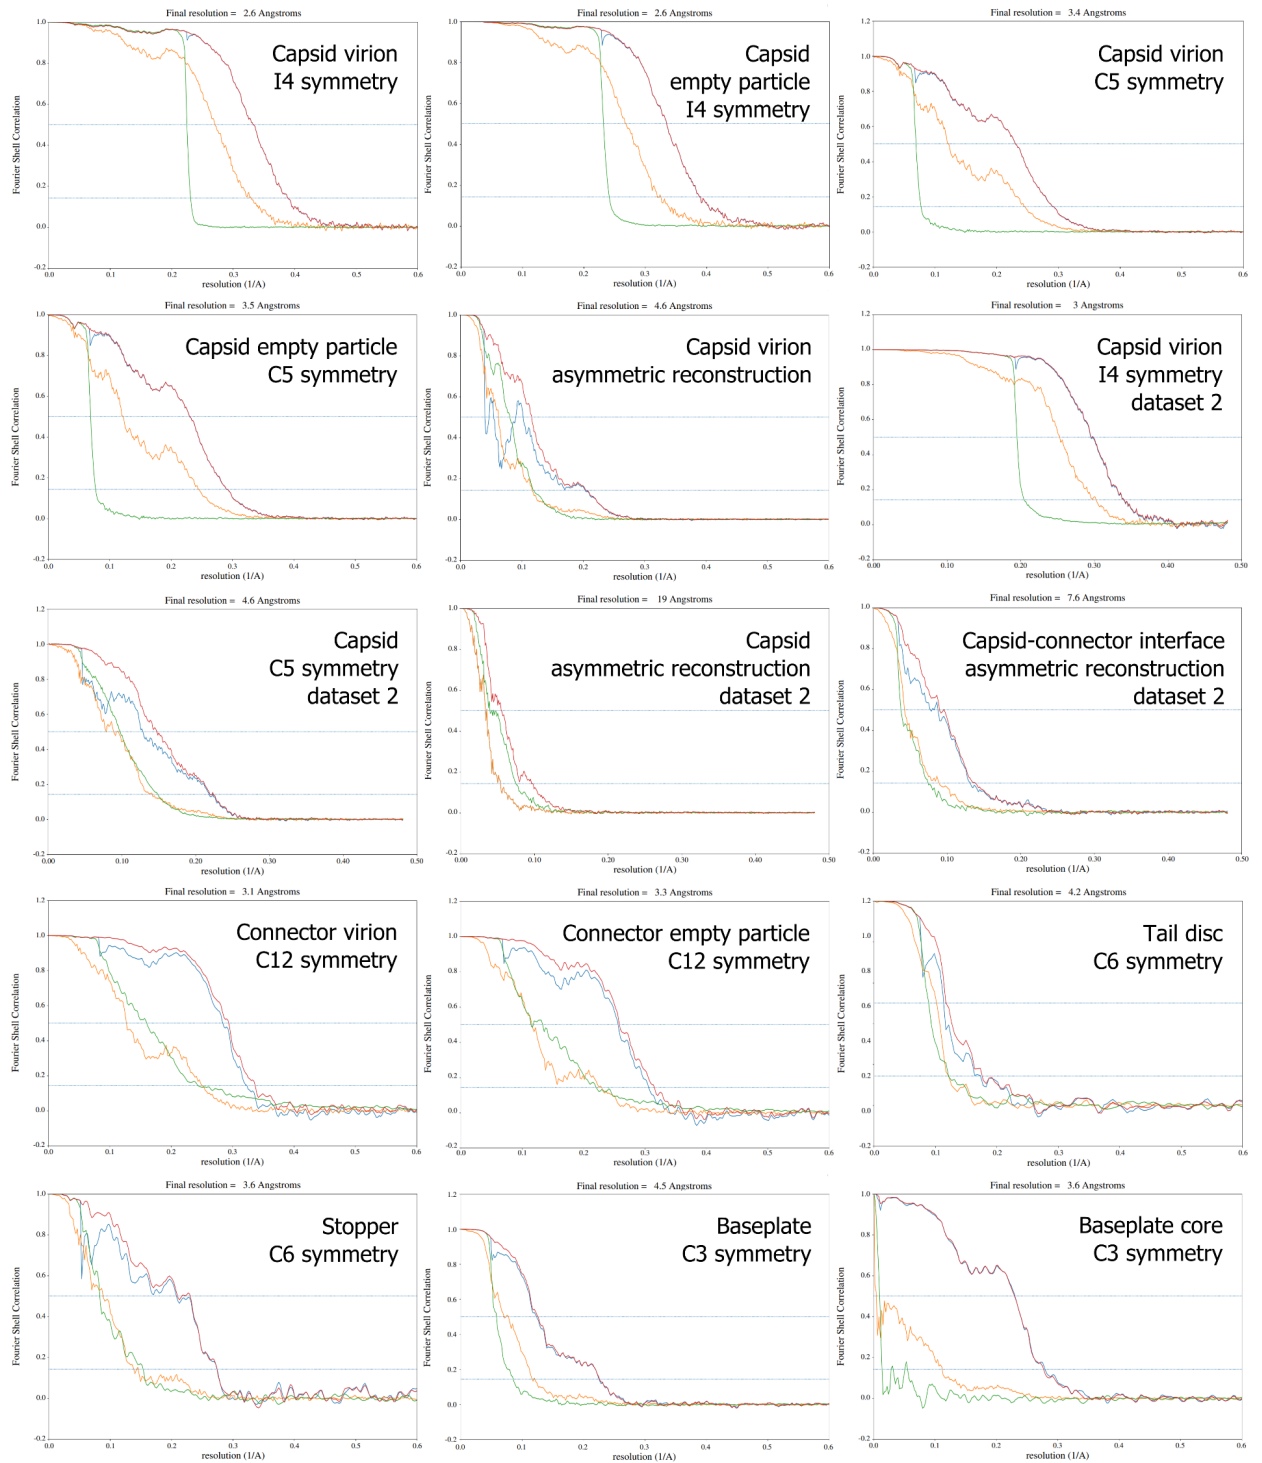

18

19 **Appendix Figure S1. Continues on the next page.**

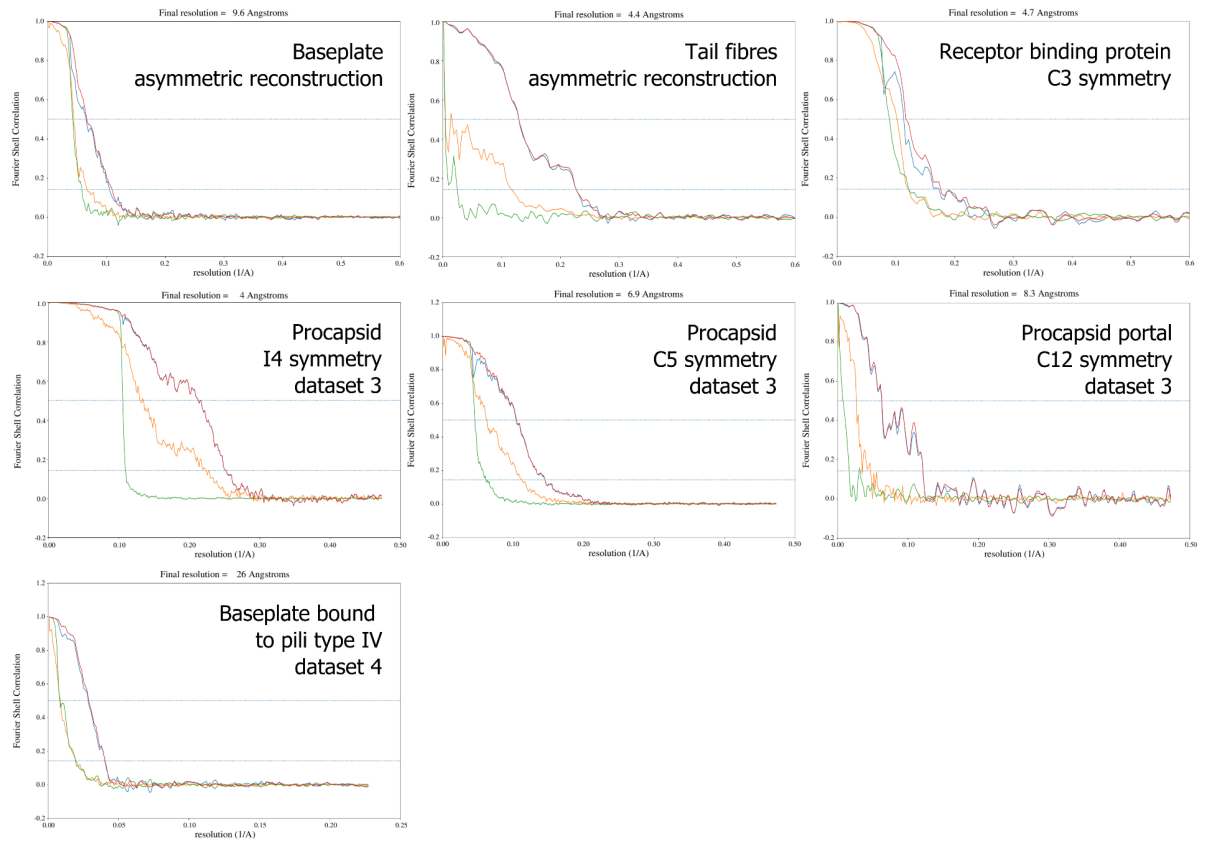

20

21 **Appendix Figure S1. FSC curves of cryo-EM reconstructions.** Fourier shell correlation curves of Fourier  
 22 shell correlation corrected half-maps (blue), unmasked half-maps (orange), masked half-maps (red),  
 23 and phase randomized masked half-maps (green) of individual cryo-EM reconstructions. The horizontal  
 24 blue lines indicate the reference FSC values of 0.143 and 0.5. The final resolution is reported for the  
 25 FSC cutoff at 0.143.

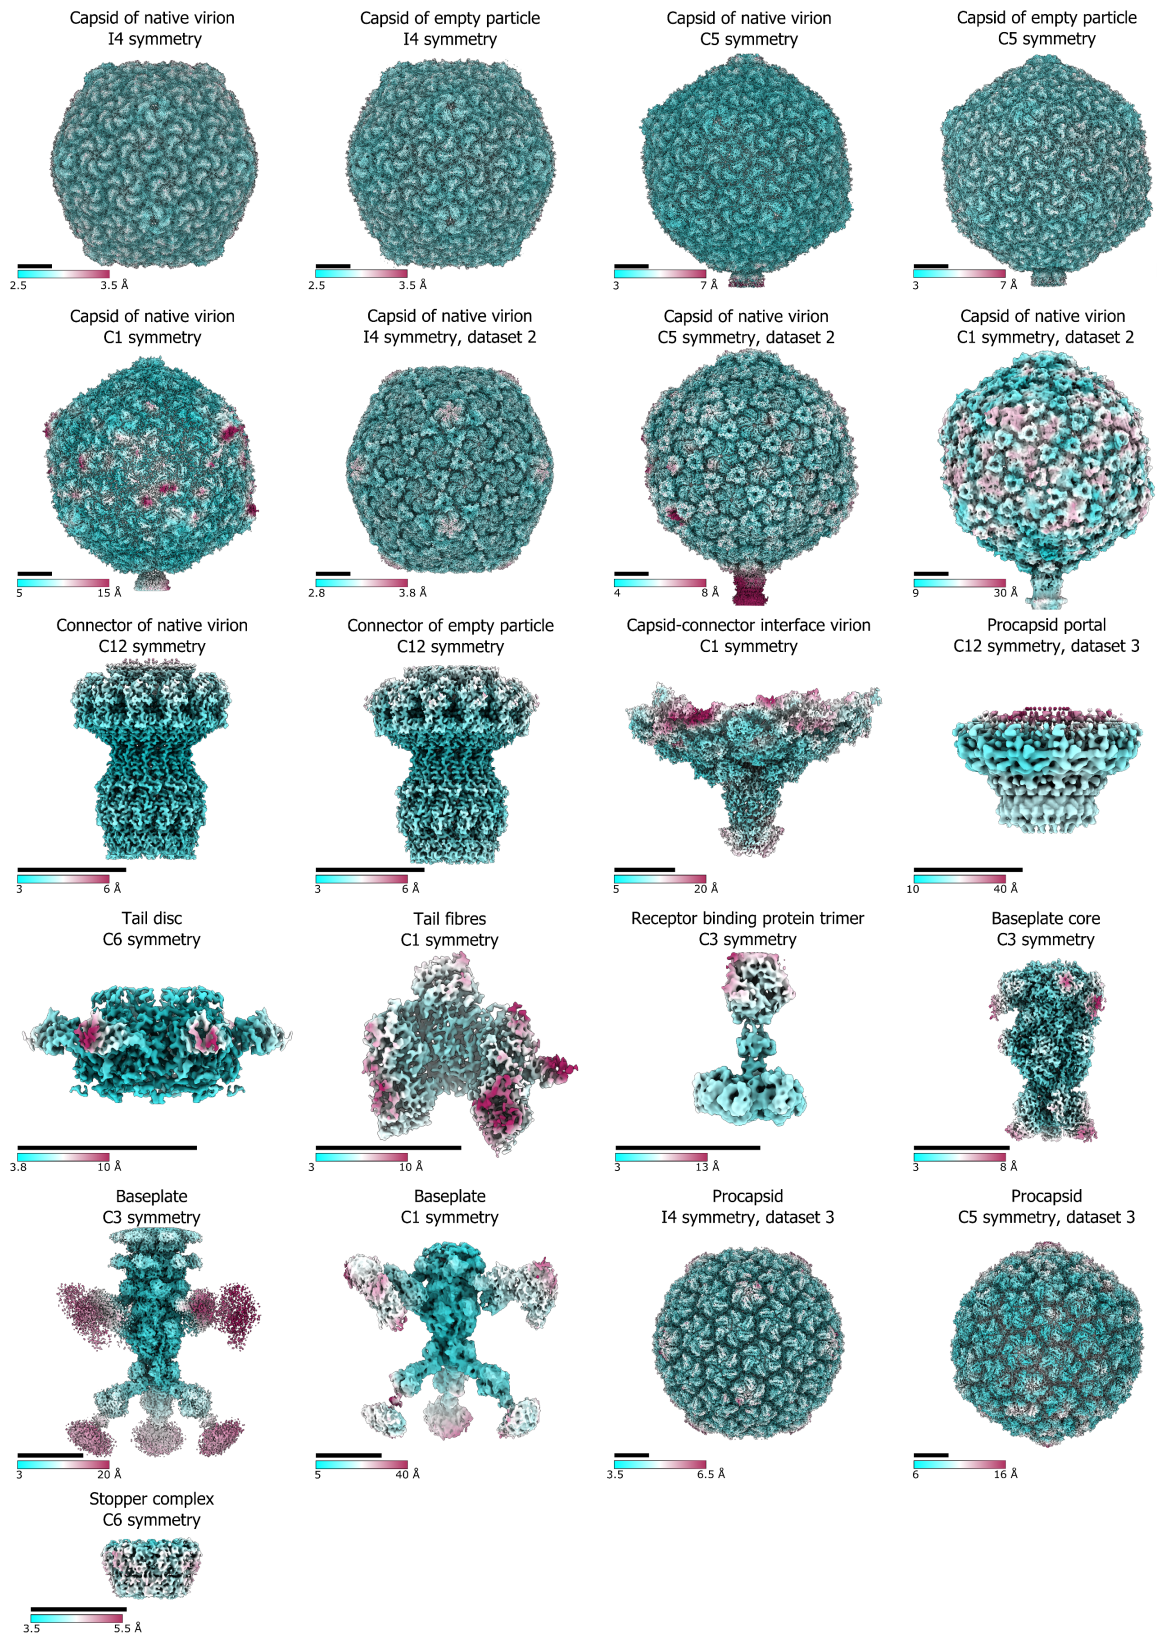

26

27 **Appendix Figure S2. Local resolution maps of cryo-EM reconstructions.** Local resolution estimation28 was calculated using RELION 3.1 (Zivanov *et al*, 2018; Kucukelbir *et al*, 2014). Scale bars correspond to

29 10 nm.

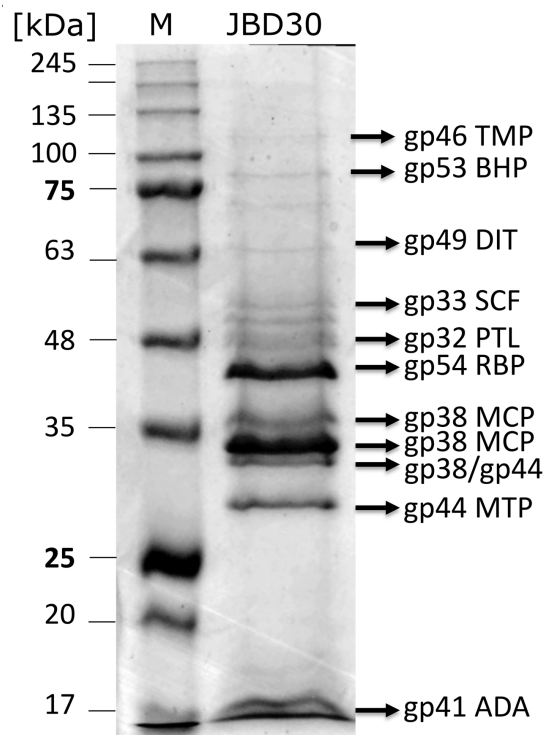

30

31 **Appendix Figure S3. Characterization of protein composition of JBD30 virion.** SDS-PAGE of proteins  
 32 from bacteriophage JBD30. The types of proteins in bands were determined using MALDI MS/MS. The  
 33 occurrence of one protein in multiple bands may be the result of protein fragmentation or incomplete  
 34 separation in the gel. M – protein marker, JBD30 – purified phage sample, gp – gene product, TMP –  
 35 tape measure protein, BHP – baseplate hub, DIT – distal tail protein, SCF – scaffolding protein, PTL –  
 36 portal protein, RBP – receptor binding protein, MCP – major capsid protein, MTP – major tail protein,  
 37 ADA – adaptor protein.

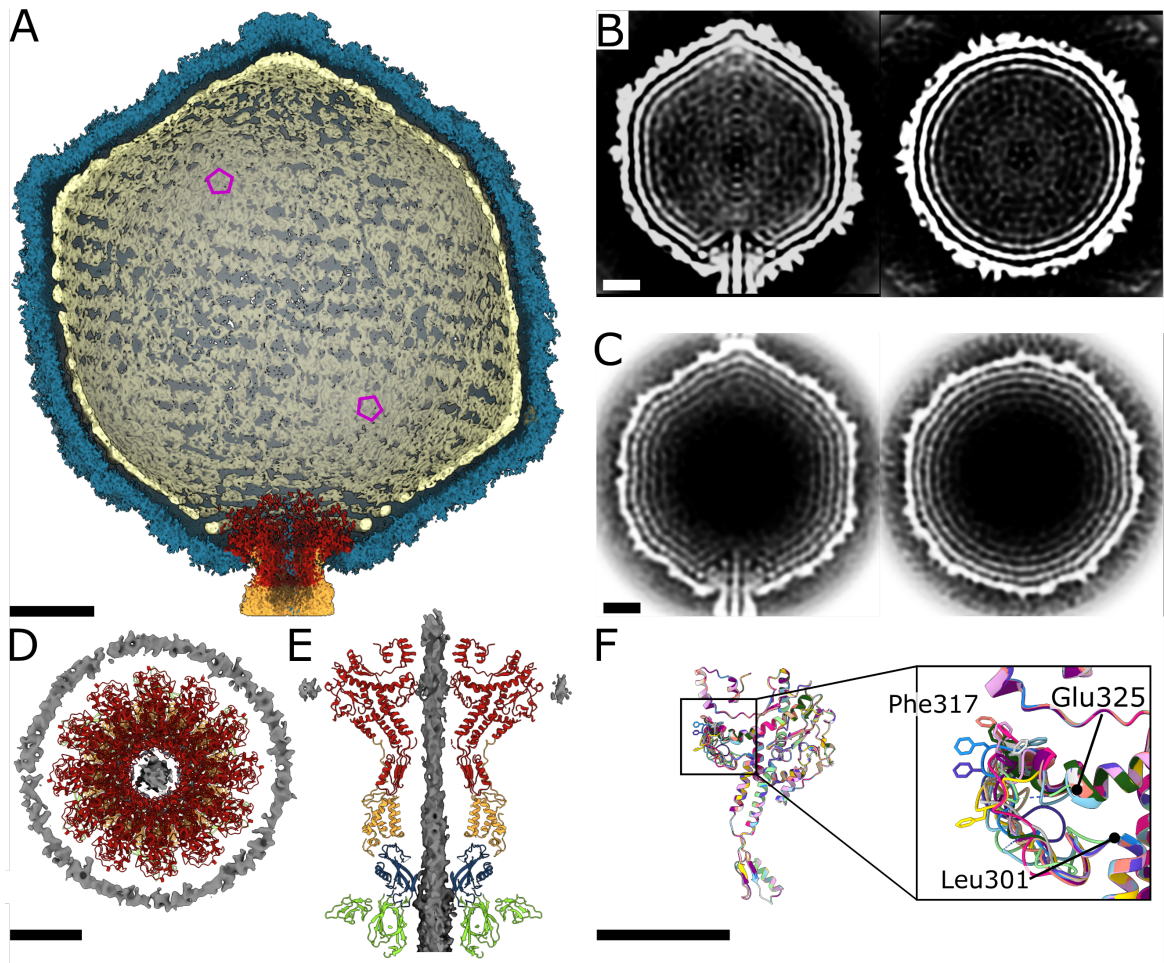

38

39 **Appendix Figure S4. Packaging of dsDNA inside capsid of JBD30 virion. (A)** Asymmetric reconstruction  
 40 of JBD30 capsid (in blue) with front half removed, showing outermost layer of packaged dsDNA  
 41 genome (yellow) lining the capsid wall. The ordering of the dsDNA is disrupted under fivefold vertices  
 42 of the capsid. Density of the portal complex is shown in red, and that of the adaptor complex in orange.  
 43 Positions of selected fivefold vertices are indicated by purple pentagons. Scale bar represents 10 nm.  
 44 Central slices through fivefold symmetrized **(B)** and asymmetric **(C)** reconstructions of JBD30 head. The  
 45 maps were low-pass filtered to 20 Å. Scale bars represent 10 nm. Top **(D)** and sideview **(E)** of interaction  
 46 of packaged dsDNA with connector proteins. The proteins are shown in cartoon representation with  
 47 portal proteins in red, adaptor proteins in orange, stopper proteins in blue, and major tail proteins in  
 48 green. The density assigned to the dsDNA is highlighted in dark grey. Scale bar 5 nm. **(F)** Cartoon  
 49 representation of the twelve portal proteins were superimposed to illustrate the differences in the  
 50 Leu301–Glu325 loop.

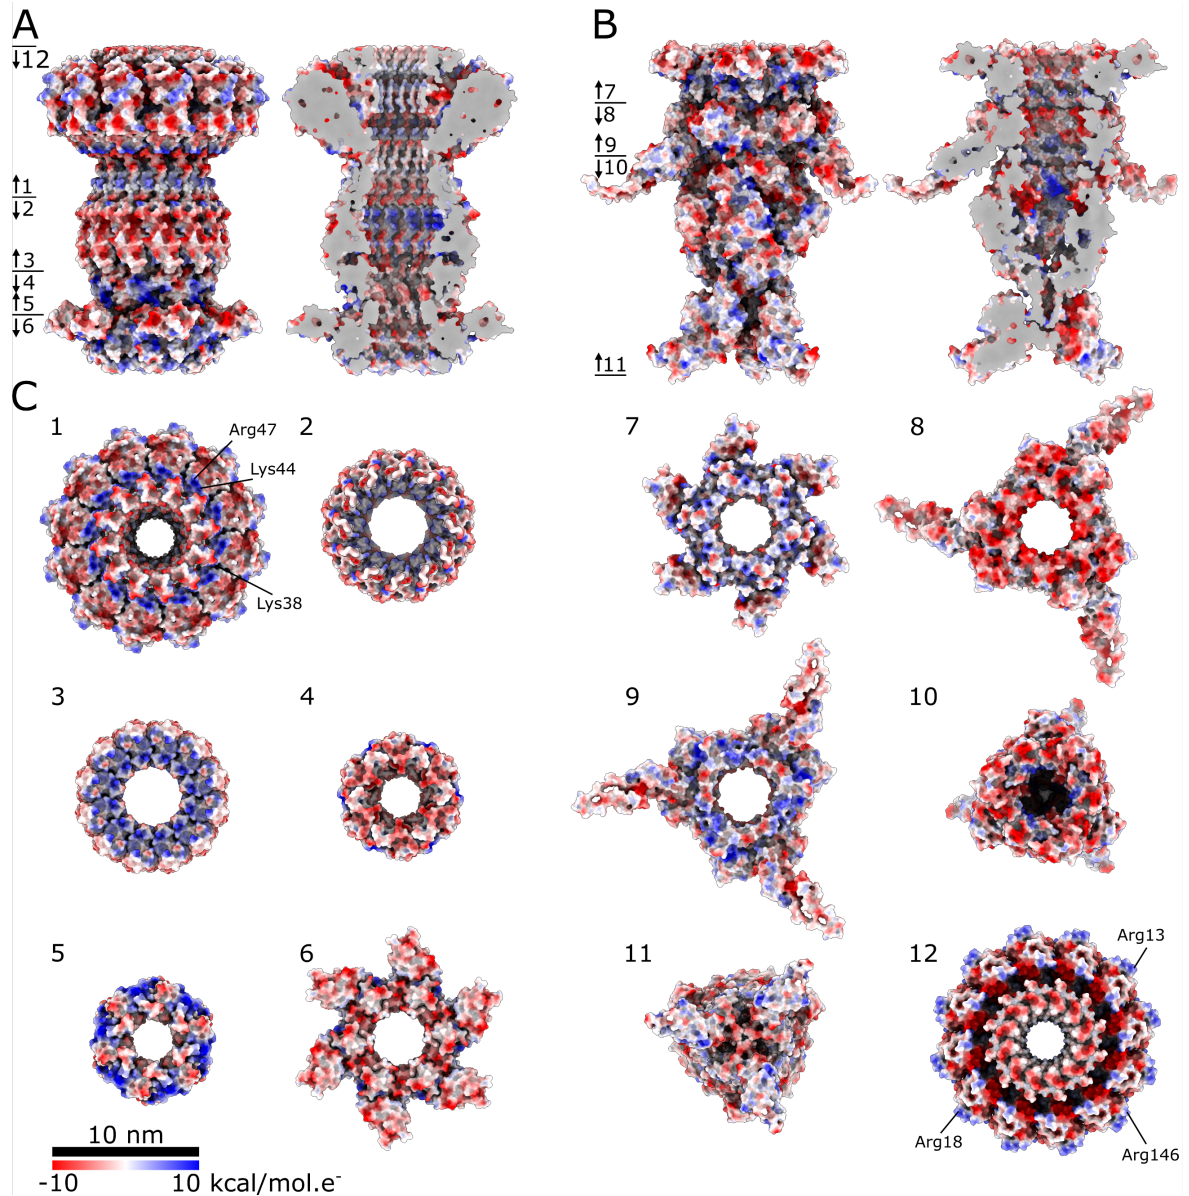

51

52

53

54

55

56

57

58

59

60

**Appendix Figure S5. Electrostatic charge distribution of JBD30 connector and tail-forming protein oligomers.** Molecular surface representation of **(A)** neck region and **(B)** baseplate core coloured according to electrostatic potential ( $\pm 10$  kcal/mol/e). Both the neck and the baseplate core are shown in a side view and then in a side view with the front half removed to show the electrostatic potential of the channel. **(C)** Top and bottom views of individual protein rings, the positions of the views are indicated by numbers and arrows in (A) and (B). 1 – portal protein dodecamer with highlighted residues interacting with the capsid, 2, 3 – adaptor protein dodecamer, 4, 5 – stopper protein hexamer, 6, 7 – major tail protein hexamer, 8, 9 – distal tail protein trimer, 10, 11 – baseplate hub protein trimer, 12 – portal protein dodecamer top view, residues interacting with the genome are highlighted.

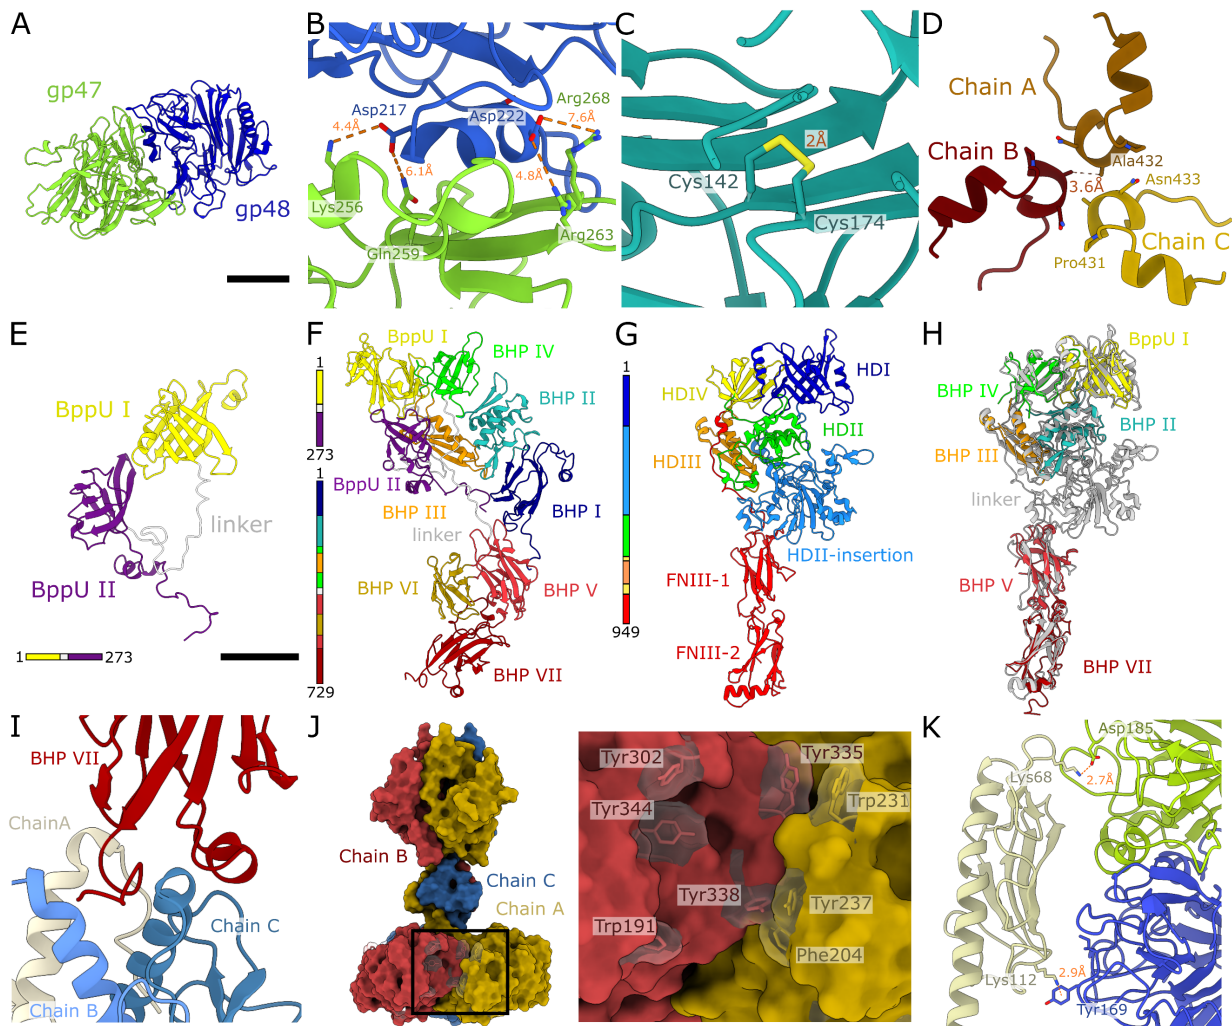

61

62

63

64

65

66

67

68

69

70

71

72

73

74

75

76

77

78

79

80

81

82

**Appendix Figure S6. JBD30 baseplate and its comparison with that of bacteriophage T5.** (A) Cartoon representation of tail fibre forming proteins *gp47* (green) and *gp48* (blue). (B) Interaction of helix Pro216–Ser224 of JBD30 *gp48* (ultramarine blue) with *gp47* (green). The proteins are shown in cartoon representation and the side chains of the interacting residues are shown in stick representation. Distances between selected atoms are indicated. (C) Disulphide bond between Cys142 and Cys174 of tail fibre protein *gp48*. (D) Cartoon representation of baseplate tip formed by three baseplate hub proteins as seen from baseplate interior. (E) Cartoon representation of upper baseplate protein (BppU) with domains coloured according to the sequence diagram at the bottom of the panel. (F) Cartoon representation of JBD30 baseplate hub protein (BHP), upper baseplate protein complex coloured according to the sequence diagrams on the left of the panel. (G) Cartoon representation of bacteriophage T5 baseplate hub protein pb3 coloured according to domains (Linares *et al*, 2022) (HD – Hub domain, FN – Fibronectin domain). (H) Superposition of JBD30 baseplate hub protein and baseplate upper protein domains coloured as in (F) onto T5 phage baseplate hub protein shown in grey. (I) Interactions between hub protein and trimer of receptor binding proteins. The C-terminus of the hub protein (red) is wedged into the pockets formed by N-terminal thigh domains of the three receptor binding proteins (J) Molecular surface representation of trimer of receptor binding proteins, and detail of putative O-antigen binding cleft between two receptor binding protein foot domains rich in aromatic residues. (K) Cartoon representation of the interactions between *P. aeruginosa pilA* (beige) and JBD30 tail fibre forming heterodimer of *gp47* (green) and *gp48* (ultramarine blue) predicted using AlphaFold2 multimer (Evans *et al*, 2021). The side chains of the interacting residues are shown in stick representation. Distances between selected atoms are indicated.



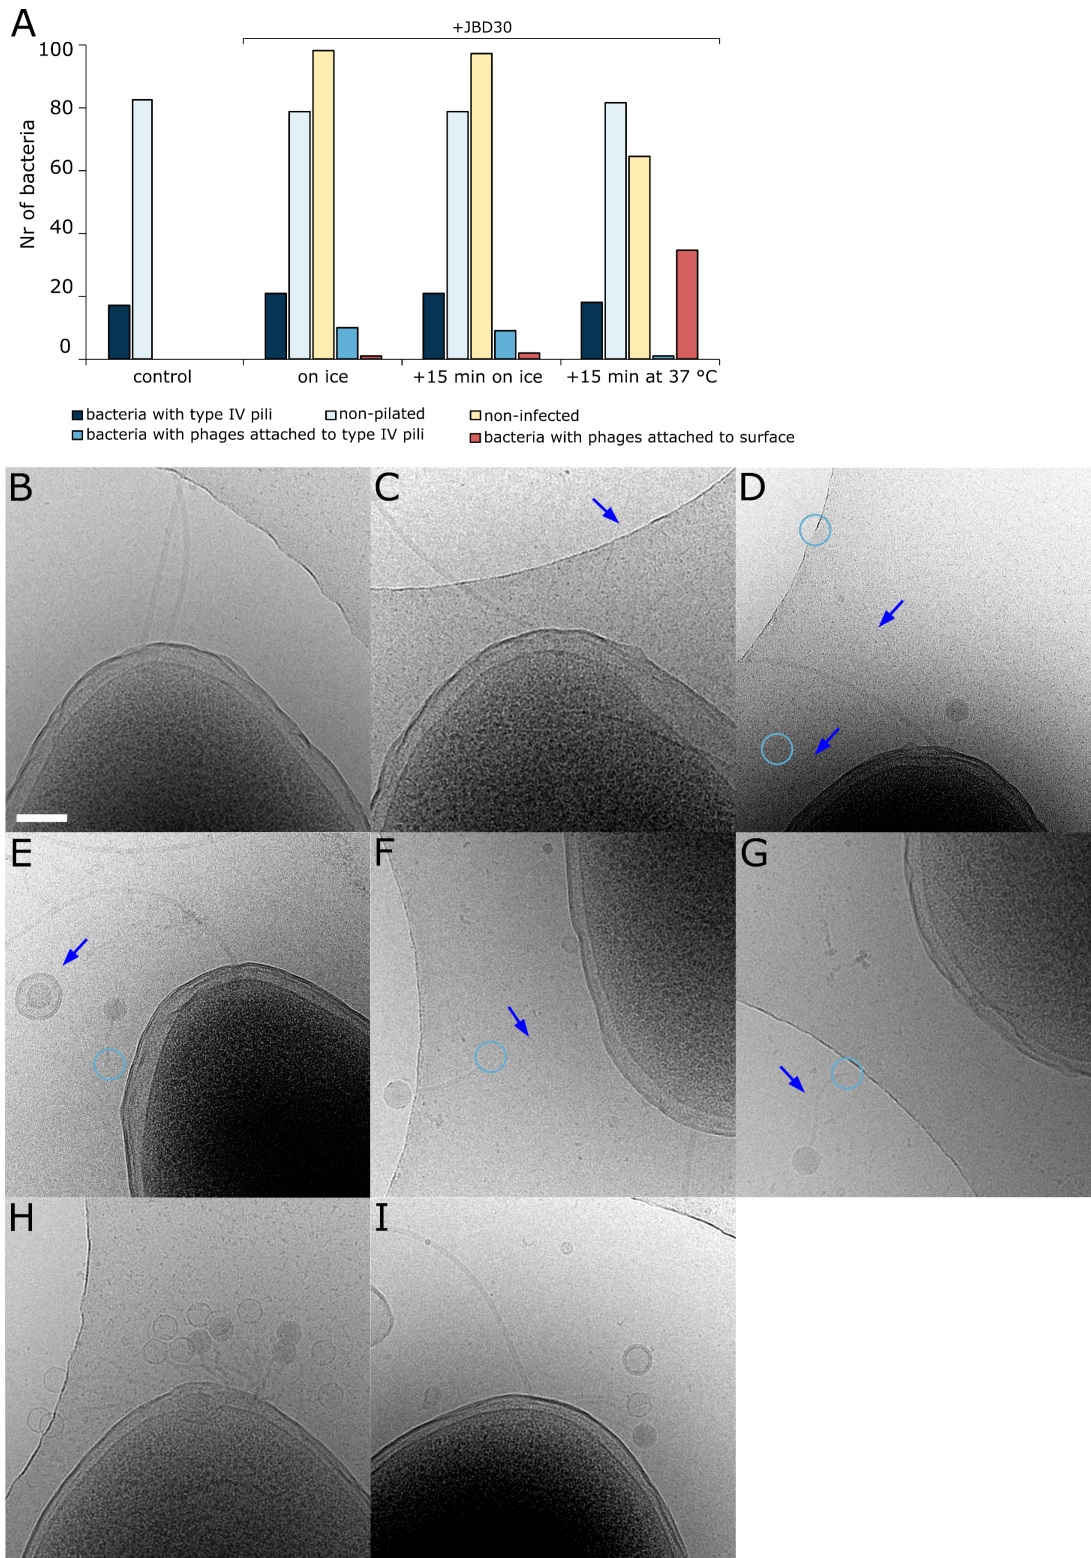

83

84 **Appendix Figure S7.** Translocation of phage JBD30 to *P. aeruginosa* cell surface is inhibited by low  
 85 temperature. **(A)** Plot of *P. aeruginosa* cells forming type IV pili and distribution of JBD30 particles on  
 86 infected *P. aeruginosa* cells. One hundred cells were analyzed for each group. Images of cells from each  
 87 of the analyzed groups: **(B)** control, **(C)** cells incubated with JBD30 for 15 min on ice, and **(D)** cells  
 88 incubated with JBD30 for 15 min on ice and for additional 15 min at 37°C, **(E)** cells incubated with  
 89 JBD30 for 30 min on ice. Blue arrows point to type IV pili, contacts between the JBD30 baseplates and  
 90 type IV pili are highlighted with cyan circles. Scale bar represents 100 nm.



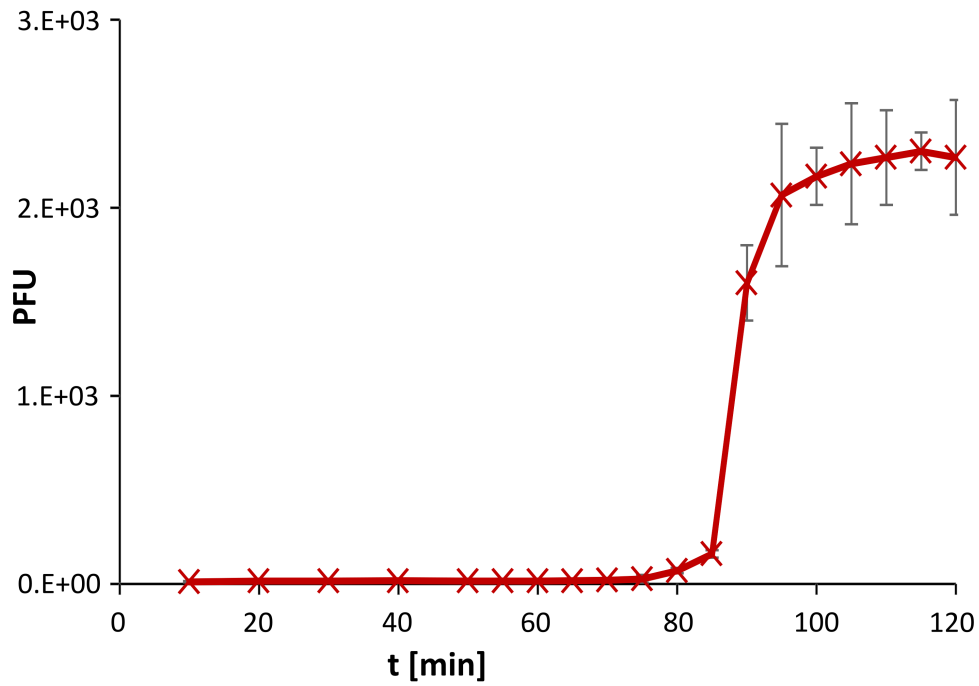

114

115 **Appendix Figure S9. One-step growth curve of phage JBD30 propagated on *P. aeruginosa* strain BAA-**  
116 **28.** The latent period of JBD30 infection lasts approximately 85 min. Average burst size is  $140 \pm 20$   
117 virions per infected cell. The curve is an average of three independent experiments. The error bars  
118 show standard deviations.

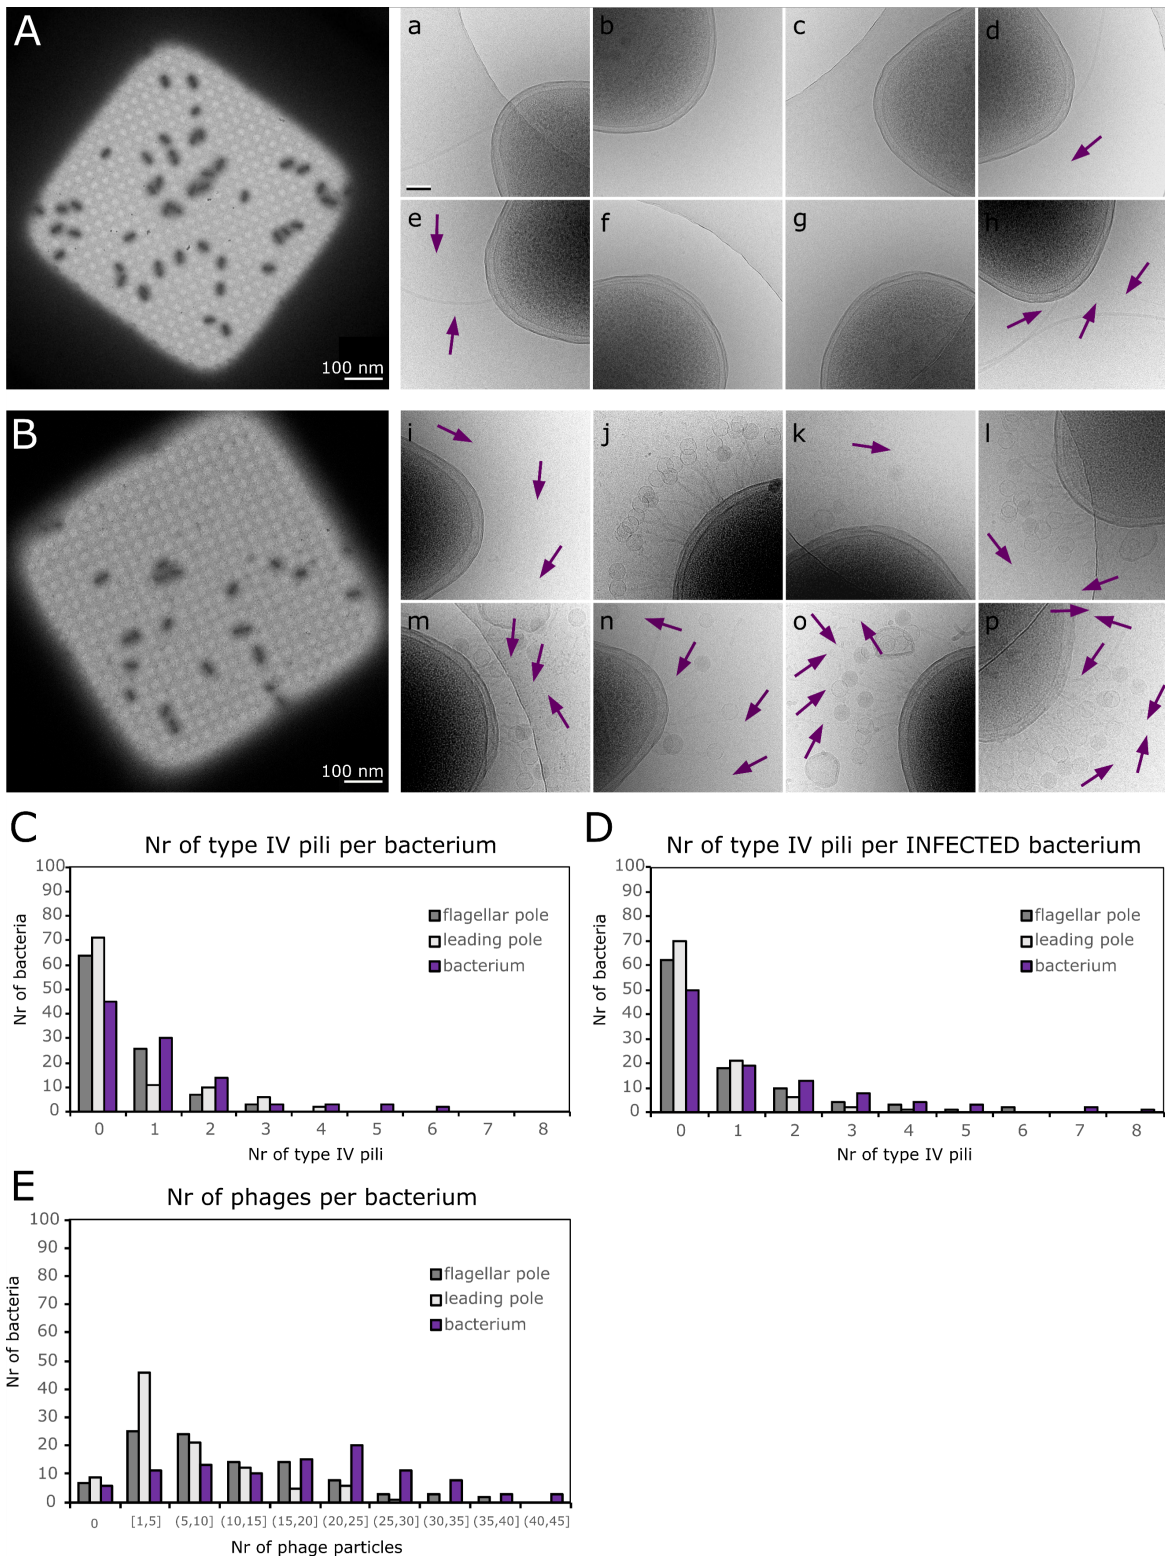

119

120

121

122

123

124

125

126

**Appendix Figure S10. Expression of type IV pili by *P. aeruginosa* cells. (A)** Control non-infected cells of *P. aeruginosa* imaged using cryo-EM, the pairs of panels **ab**, **cd**, **ef**, and **gh** show opposite poles of four selected cells. Purple arrows point to type IV pili. **(B)** *P. aeruginosa* cells infected with JBD30 virions at MOI 500 imaged three min post-infection. Images **i–p** show cell poles of 8 selected cells, purple arrows point to type IV pili. **(C)** In total 100 control and **(D)** 100 infected *P. aeruginosa* cells were imaged to calculate the average number of type IV pili formed by individual cells. **(E)** Distribution of phage particles attached to 100 infected *P. aeruginosa* cells.

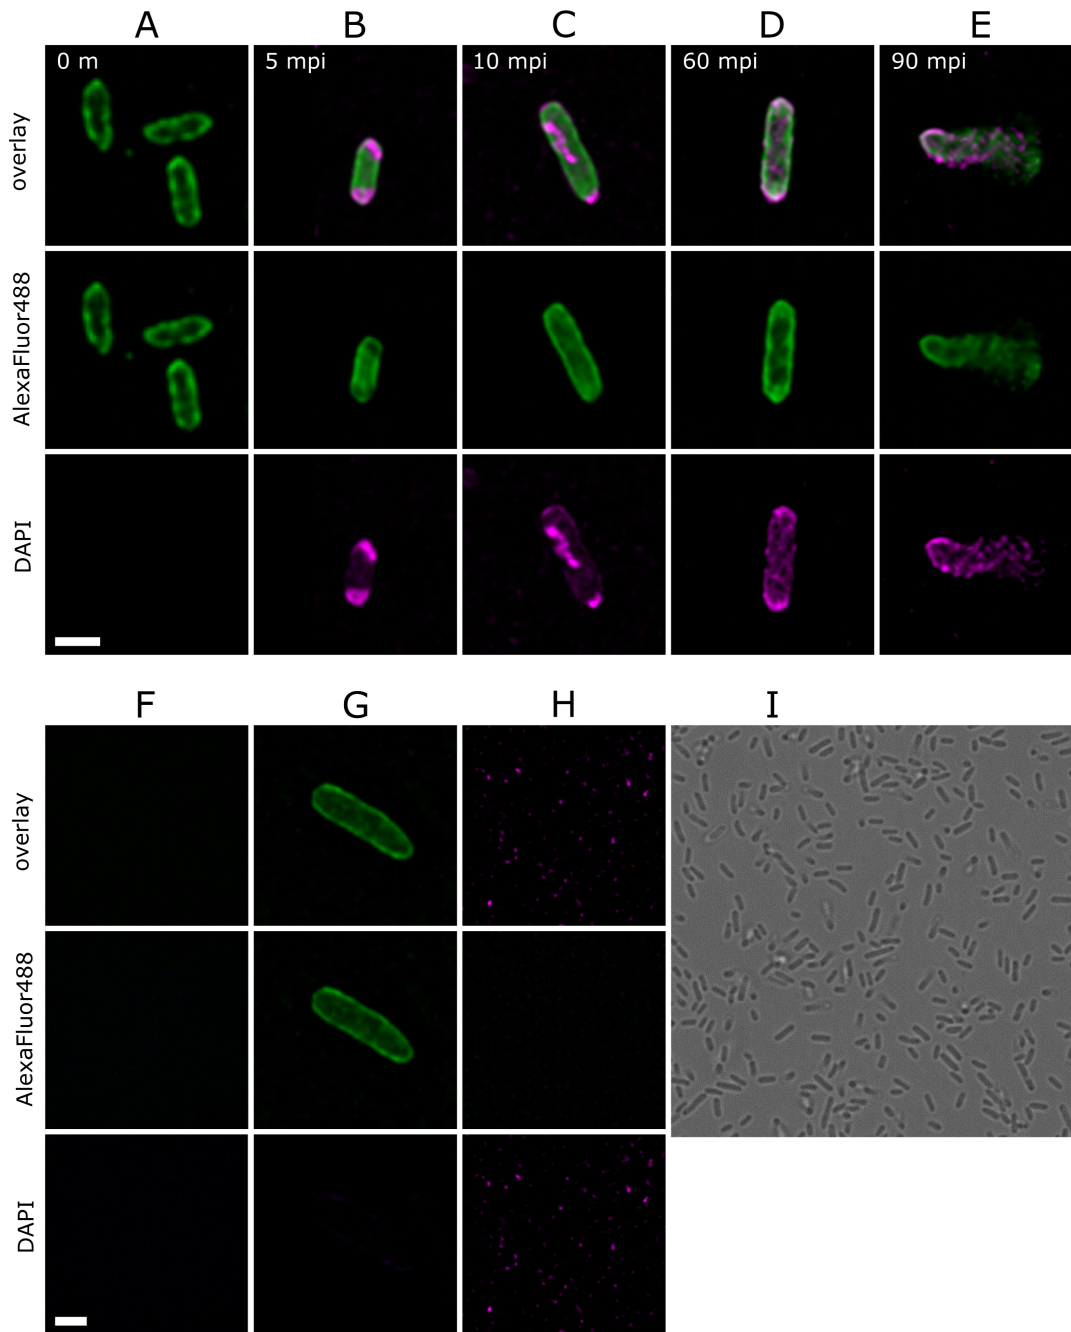

127

128 **Appendix Figure S11. Replication cycle of bacteriophage JBD30 visualized using lattice SIM**  
 129 **fluorescence microscopy.** The phage genome is labelled with DAPI (magenta), *P. aeruginosa* PAO1 *pilA-*  
 130 *A86C* cells are labelled with Alexa Fluor 488 C5 maleimide (green). Scale bars 1  $\mu\text{m}$ , unless indicated  
 131 otherwise. Mpi - min post-infection. **(A)** Non-infected cells of *P. aeruginosa*. **(B)** *P. aeruginosa* cells  
 132 infected with JBD30. The phage signal is localized to the cell poles, since the phages utilize type IV pili  
 133 to attach to cells. **(C)** Delivery of JBD30 genome into host cell. **(D)** Assembly of new virions. The DAPI  
 134 signal becomes granular as the labelled DNA is filled into the capsids. **(E)** Cell lysis and release of phage  
 135 progeny. **(F)** Control sample showing non-labelled cells of *P. aeruginosa*. Scale bar 1  $\mu\text{m}$ . No  
 136 fluorescence signal is observed. **(G)** Mock infected *P. aeruginosa* cells labelled with C5 maleimide. The  
 137 absence of any DAPI signal indicates that there is no free DAPI in the phage lysate. **(H)** JBD30 virions  
 138 labelled with DAPI. **(I)** *P. aeruginosa* cells imaged in transmitted light. Scale bar 5  $\mu\text{m}$ . Please note that  
 139 images shown in panels A-E are identical to those displayed in Fig. 7 F,H, L, J.

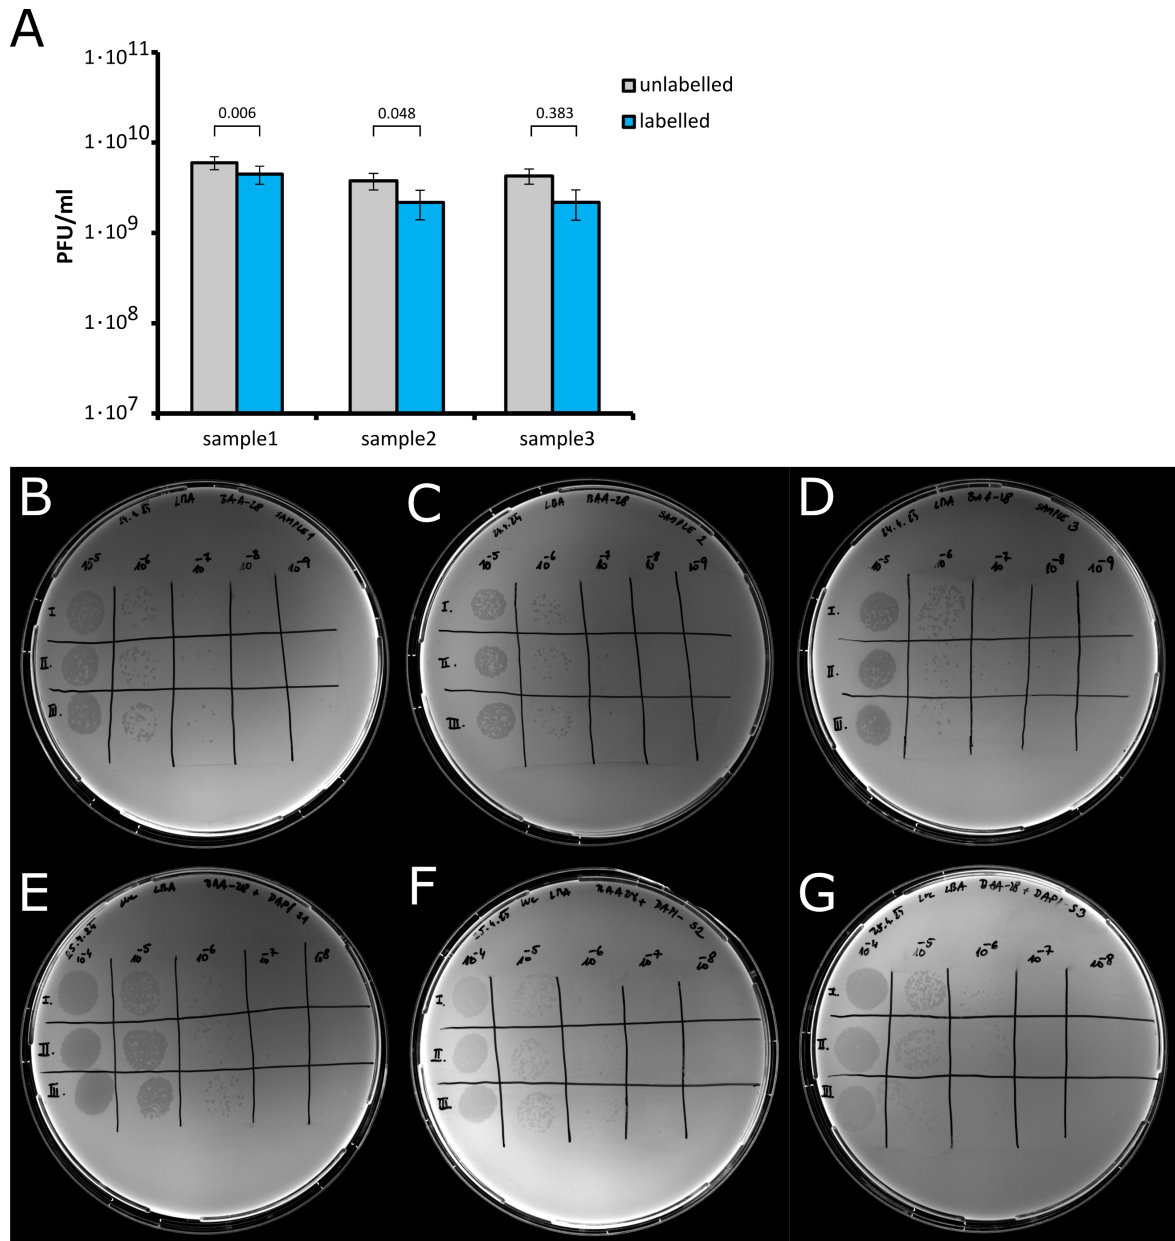

140

141

142

143

144

145

**Appendix Figure S12. Effect of DAPI labelling on phage JBD30 viability. (A)** Titer of JBD30 lysate (PFU/ml) was measured before and after labelling with DAPI. Phage titer was measured in triplicates in three independent biological experiments. The error bars represent standard deviations. The effect of DAPI staining of JBD30 viability is limited. **(B-G)** Lawns of *P. aeruginosa* BAA-28 used for determining the titer of unlabelled and DAPI-labelled JBD30.

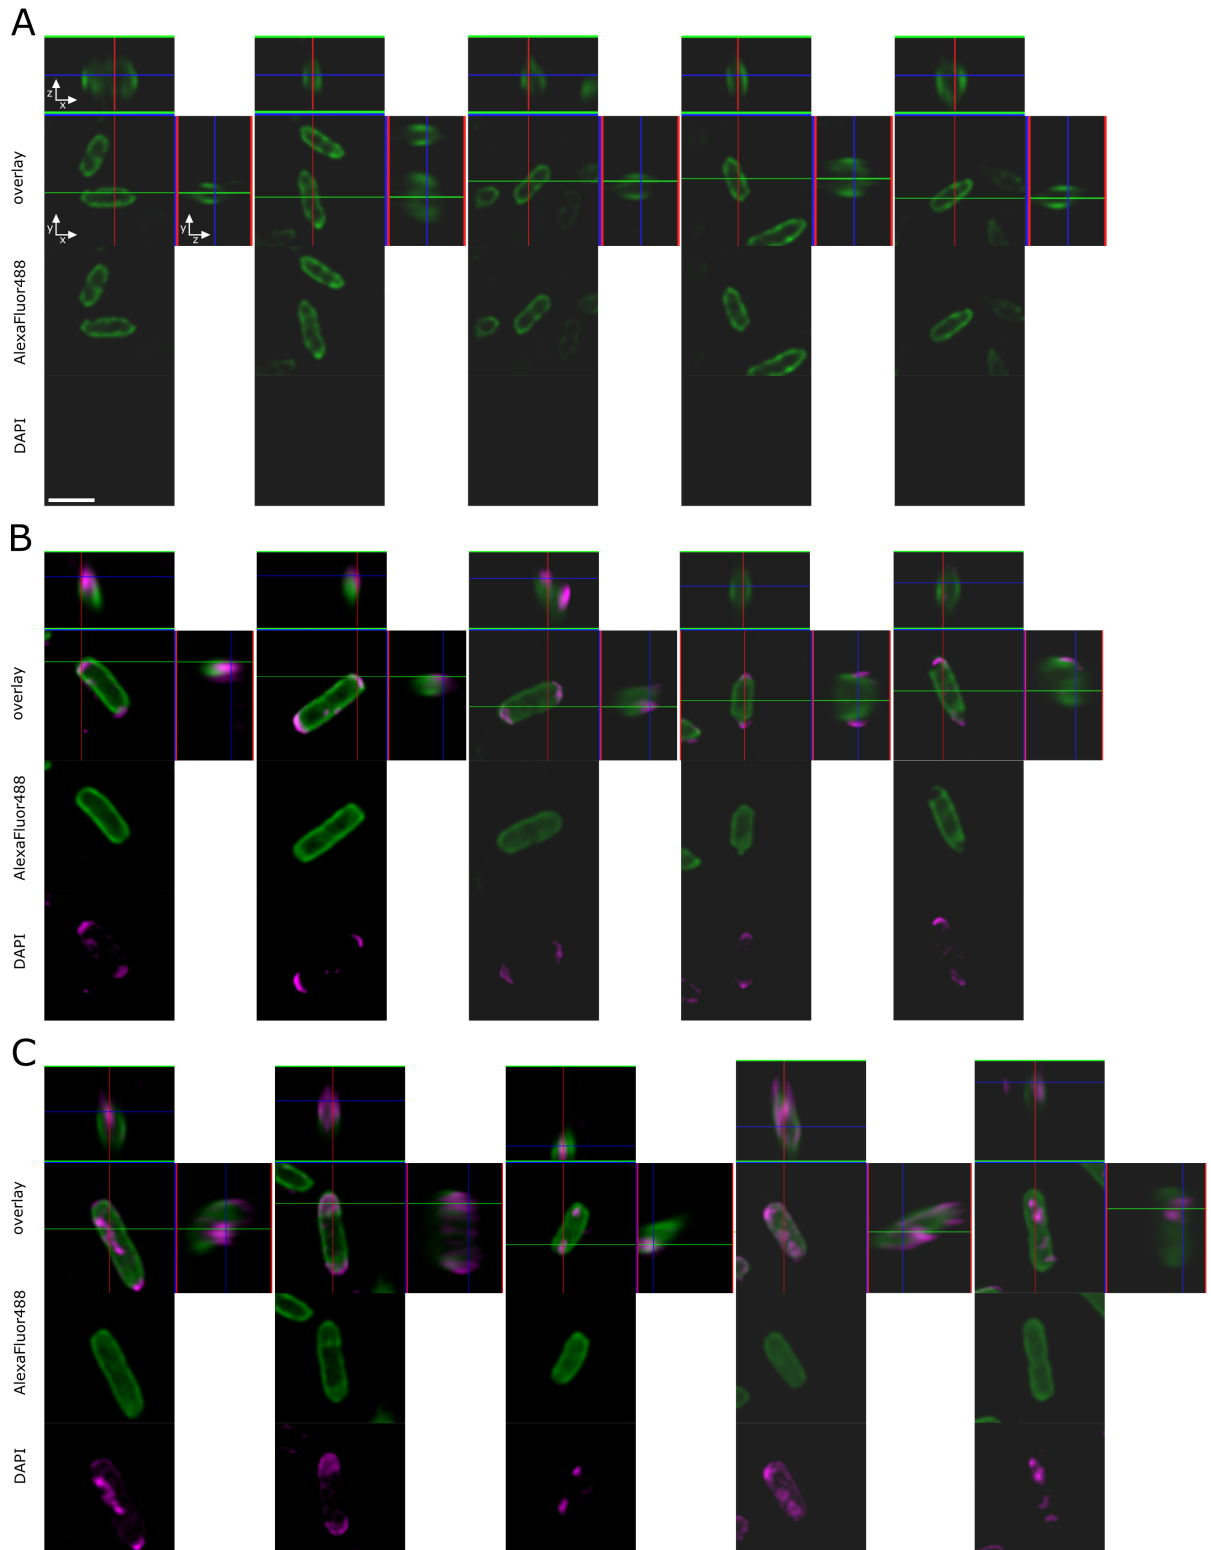

146

147 **Appendix Figure S13. Lattice SIM fluorescence microscopy of *P. aeruginosa* cells infected by DAPI-**  
 148 **labelled JBD30. Continues on the next page.**

149

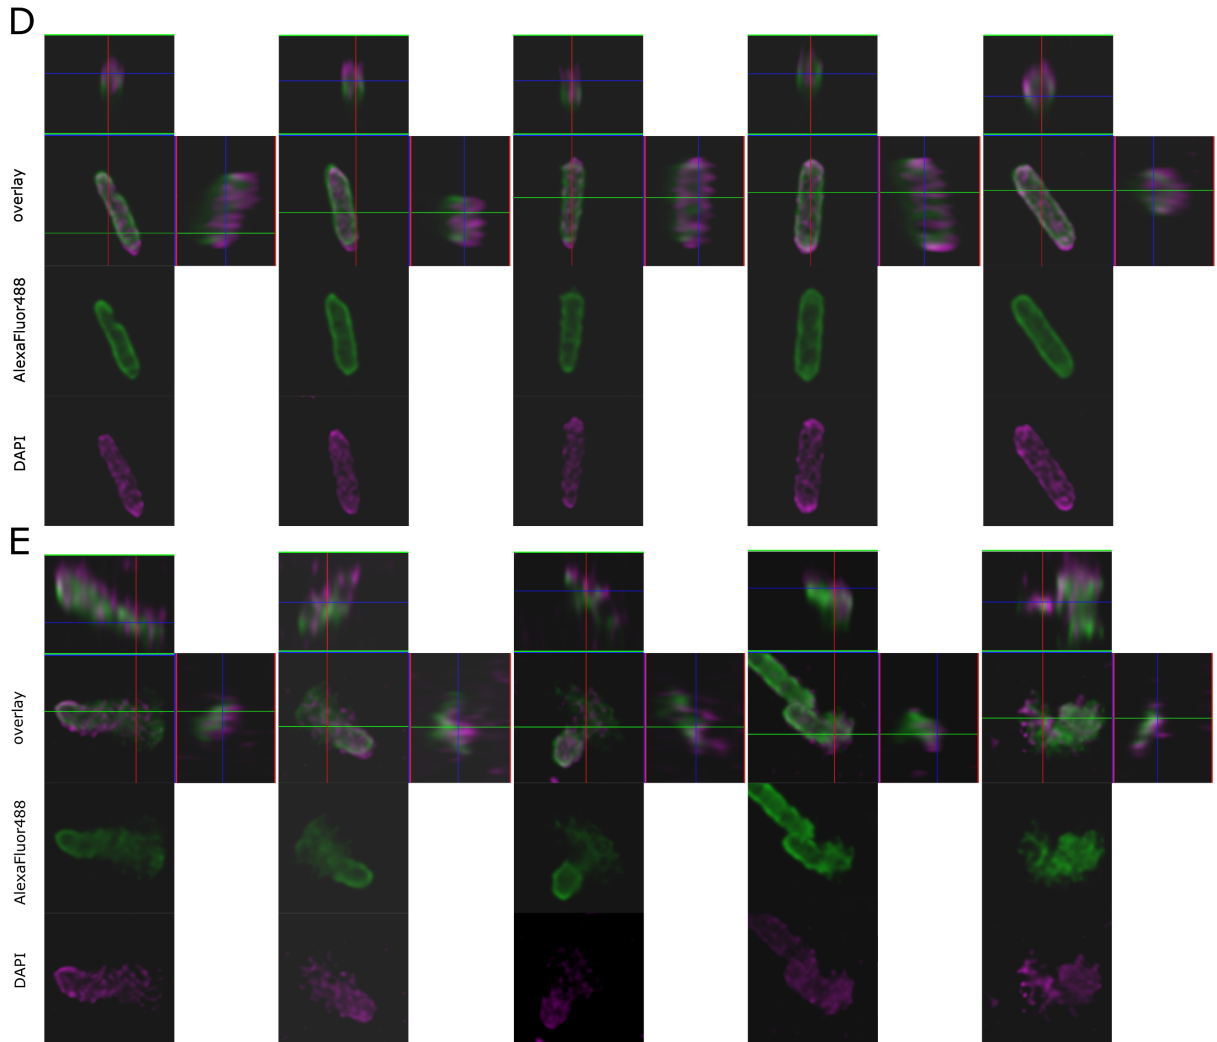

150

151

152

153

154

155

156

**Appendix Figure S13. Lattice SIM fluorescence microscopy of *P. aeruginosa* cells infected by DAPI-labelled JBD30.** xz and yz sections through z-stacks of IM images. The phage genome is labelled with DAPI (magenta), *P. aeruginosa* cells are labelled with Alexa Fluor 488 C5 maleimide (green). mpi - min post-infection, scale bar 1  $\mu\text{m}$ . **(A)** Non-infected *P. aeruginosa* cells. **(B)** *P. aeruginosa* cells infected by JBD30 at 5 mpi. **(C)** Delivery of JBD30 genome into host cell, 10 mpi **(D)** Assembly of new virions, 60 mpi. **(E)** Cell lysis and release of phage progeny, 90 mpi.



**Appendix Table S1. Complete list of JBD30 encoded genes.** Genes encoding structural proteins are highlighted in bold. Homologues were searched for using BLAST, DALI (Holm, 2022), HHPred (Zimmermann *et al*, 2018), Pfam (Mistry *et al*, 2021), IterPro (Paysan-Lafosse *et al*, 2023) and Foldseek (van Kempen *et al*, 2023). Continues on the next page.

| Orf | Gene product                               | Structural/<br>Found in<br>MS<br>analysis | No. of<br>residues | Symmetry | No. of chains<br>in virion | Modelled<br>residues | Homologue proteins                                                                                                |
|-----|--------------------------------------------|-------------------------------------------|--------------------|----------|----------------------------|----------------------|-------------------------------------------------------------------------------------------------------------------|
| 1   | Repressor cI                               | no/no                                     | 219                | -        | -                          | -                    | phage MP22 ORF1, <i>E. coli</i> phage 186 repressor c1, $\lambda$ repressor c1 3BDN                               |
| 2   | Ner like transcription regulator           | no/no                                     | 118                | -        | -                          | -                    | phage DMS3 <i>Ner</i>                                                                                             |
| 3   | Repressor cII                              | no/no                                     | 144                | -        | -                          | -                    | phage P22 CII repressor 1ADRa                                                                                     |
| 4   | Moron gene                                 | no/no                                     | 108                | -        | -                          | -                    | affects bacterial cell twitching motility (Tsao <i>et al</i> , 2018)                                              |
| 5   | Aqs1 protein                               | no/no                                     | 84                 | -        | -                          | -                    | quorum sensing anti-activator, phage JBD24_4 Aqs1, phage DMS3 Aqs1, JBD30 Aqs1 (Bondy-Denomy <i>et al</i> , 2015) |
| 6   | Transposase A                              | no/no                                     | 689                | -        | -                          | -                    | Enterobacteria phage Mu Transposase 4FCY                                                                          |
| 7   | Transposase B                              | no/no                                     | 250                | -        | -                          | -                    | Enterobacteria phage Mu Transposase 4FCY                                                                          |
| 8   | Hypothetical protein                       | no/no                                     | 221                | -        | -                          | -                    | -                                                                                                                 |
| 9   | Moron gene                                 | no/no                                     | 211                | -        | -                          | -                    | affects bacterial surface LPS O-antigen production (Tsao <i>et al</i> , 2018)                                     |
| 10  | Hypothetical protein                       | no/no                                     | 38                 | -        | -                          | -                    | -                                                                                                                 |
| 11  | Hypothetical protein                       | no/no                                     | 137                | -        | -                          | -                    | -                                                                                                                 |
| 12  | Hypothetical protein                       | no/no                                     | 97                 | -        | -                          | -                    | -                                                                                                                 |
| 13  | Host-nuclease inhibitor Gam family protein | no/no                                     | 172                | -        | -                          | -                    | host-nuclease inhibitor Gam family protein of <i>Pseudomonas aeruginosa</i>                                       |
| 14  | Moron gene                                 | no/no                                     | 67                 | -        | -                          | -                    | affects bacterial growth rate (Tsao <i>et al</i> , 2018)                                                          |
| 15  | Hypothetical protein                       | no/no                                     | 102                | -        | -                          | -                    | -                                                                                                                 |
| 16  | Hypothetical protein                       | no/no                                     | 93                 | -        | -                          | -                    | -                                                                                                                 |
| 17  | Hypothetical protein                       | no/no                                     | 68                 | -        | -                          | -                    | -                                                                                                                 |
| 18  | Hypothetical protein                       | no/no                                     | 89                 | -        | -                          | -                    | -                                                                                                                 |
| 19  | Hypothetical protein                       | no/no                                     | 98                 | -        | -                          | -                    | -                                                                                                                 |
| 20  | Regulatory protein GemA                    | no/no                                     | 135                | -        | -                          | -                    | multispecies: regulatory protein GemA                                                                             |
| 21  | Middle operon regulator                    | no/no                                     | 149                | -        | -                          | -                    | Middle operon regulator Mor phage Mu, 1RR7                                                                        |
| 22  | Hypothetical protein                       | no/no                                     | 115                | -        | -                          | -                    | -                                                                                                                 |
| 23  | Hypothetical protein                       | no/no                                     | 140                | -        | -                          | -                    | -                                                                                                                 |
| 24  | Hypothetical protein                       | no/no                                     | 138                | -        | -                          | -                    | -                                                                                                                 |
| 25  | Hypothetical protein                       | no/no                                     | 39                 | -        | -                          | -                    | -                                                                                                                 |
| 26  | Hypothetical protein                       | no/no                                     | 133                | -        | -                          | -                    | -                                                                                                                 |
| 27  | Endonuclease                               | no/no                                     | 37                 | -        | -                          | -                    | phage T4 endonuclease 2END                                                                                        |
| 28  | Hypothetical protein                       | no/no                                     | 62                 | -        | -                          | -                    | -                                                                                                                 |
| 29  | DUF1804 family protein                     | no/no                                     | 166                | -        | -                          | -                    | DUF1804 family protein<br><i>Pseudomonas aeruginosa</i>                                                           |
| 30  | Moron gene                                 | no/no                                     | 164                | -        | -                          | -                    | blocks phage genome injection (Tsao <i>et al</i> , 2018)                                                          |
| 31  | Terminase large subunit                    | no/no                                     | 550                | -        | -                          | -                    | phage T4 large terminase 3CPE, phage D6E large terminase subunit: 5OE8, phage Sf6 terminase 4IDH                  |

Appendix Table S1. Complete list of JBD30 encoded genes - Continued.

|    |                                                |         |      |     |              |                |                                                                                                                                                          |
|----|------------------------------------------------|---------|------|-----|--------------|----------------|----------------------------------------------------------------------------------------------------------------------------------------------------------|
| 32 | <b>Portal protein</b>                          | yes/yes | 526  | C12 | 12           | 5–409          | phage G20C portal protein 4ZJN, phage T4 portal protein gp20 3JA7, HK97 family phage portal protein 3KDR-C, phage SPP1 portal protein 2JES               |
| 33 | Scaffolding protein                            | yes/yes | 428  | ?   | in procapsid | -              | Phage Mu protein F like protein VVH83508.1                                                                                                               |
| 34 | Virion morphogenesis protein                   | no/no   | 155  | -   | -            | -              | virion morphogenesis protein of <i>Pseudomonas aeruginosa</i>                                                                                            |
| 35 | Anti-CRISPR protein Acrf1                      | no/no   | 78   | -   | -            | -              | JBD30 AcrF1 protein 5XLO                                                                                                                                 |
| 36 | Anti-CRISPR associated regulatory protein Aca1 | no/no   | 79   | -   | -            | -              | JBD30 Aca1 anti-CRISPR-associated protein 7COB                                                                                                           |
| 37 | Prohead protease                               | no/no   | 365  | -   | -            | -              | phage protease <i>P. aeruginosa</i> seq. ID: WP_003137267.1                                                                                              |
| 38 | <b>Major capsid protein</b>                    | yes/yes | 304  | I4  | 415          | 2–151, 160–304 | GTA major capsid protein 6TSW, phage HK97 major capsid protein 1OHG, phage T7 major capsid protein 10A 3J7W                                              |
| 39 | <b>Minor capsid protein</b>                    | yes/no  | 113  | C3  | 420          | 53–108         | Phage T4 Soc protein 5VF3                                                                                                                                |
| 40 | Hypothetical protein                           | no/no   | 55   | -   | -            | -              | -                                                                                                                                                        |
| 41 | <b>Adaptor protein</b>                         | yes/yes | 138  | C12 | 12           | 2–138          | phage MU neck protein J 5YDN, phage HK97 gp6 3JVO, GTA adaptor 6TOA                                                                                      |
| 42 | <b>Stopper protein</b>                         | yes/no  | 157  | C6  | 6            | 9–32, 36–147   | phage λ tail tube terminator gpU 3FZ2, phage SPP1 head-to-tail protein 2LFP, GTA adaptor protein 6TE9                                                    |
| 43 | DNA packaging chaperone                        | no/no   | 59   | -   | -            | -              | phage λ DNA-packaging protein FI, chaperone 2LSM                                                                                                         |
| 44 | <b>Major tail protein</b>                      | yes/yes | 256  | C6  | 270          | 5–256          | Phage YSD1_22 major tail protein 6XGR, SPP1 tail tube protein gp17.1* 6YEG                                                                               |
| 45 | Tail assembly chaperone                        | no/no   | 164  | -   | -            | -              | phage HK97 tail assembly chaperone 2OB9, phage TAC13 tail assembly chaperone                                                                             |
| 46 | <b>Tape measure protein</b>                    | yes/yes | 1158 | C3  | 3            | 730–761        | phage P22 tape measure trimeric coiled-coil protein 4LIN, phage HK97 tape measure protein, phage λ tail tape measure protein                             |
| 47 | <b>Tail fibre hydrolase</b>                    | yes/no  | 318  | C1  | 9            | 2–318          | cl11424: residues 274 - 315 nitrilase superfamily protein, including nitrile- or amide-hydrolysing enzymes and amide-condensing enzymes                  |
| 48 | <b>Tail fibre</b>                              | yes/no  | 307  | C1  | 9            | 2–306          | -                                                                                                                                                        |
| 49 | <b>Distal tail protein</b>                     | yes/yes | 567  | C3  | 3            | 14–567         | phage T5 distal tail protein 6F2M                                                                                                                        |
| 50 | <b>Upper baseplate protein</b>                 | yes/no  | 273  | C3  | 3            | 2–273          | GTA baseplate 6TEH, phage PVC baseplate 6JOM, phage MUSO2 tail protein 3CDD, phage P2 putative receptor binding protein 2WZP                             |
| 51 | Hypothetical protein                           | no/no   | 76   | -   | -            | -              | -                                                                                                                                                        |
| 52 | Hypothetical protein                           | no/no   | 72   | -   | -            | -              | -                                                                                                                                                        |
| 53 | <b>Baseplate hub</b>                           | yes/yes | 735  | C3  | 3            | 2–729          | Phage T5 baseplate hub protein 7Zqp, GTA Megatron protein 6TEH, T4 phage tail-associated lysozyme 2Z6B                                                   |
| 54 | <b>Receptor binding protein</b>                | yes/yes | 382  | C3  | 9            | 10–382         | Phage vB_ApiP_P1 tail spike 6E1R, phage CBA120 6NW9, endo-1,4-beta-xylanase C 4XUP, arabinogalactan endo-1,4-beta-galactosidase 2XOM, endoglucanase 2C26 |
| 55 | Hypothetical protein                           | no/no   | 95   | -   | -            | -              | -                                                                                                                                                        |
| 56 | Hypothetical protein                           | no/no   | 74   | -   | -            | -              | -                                                                                                                                                        |

**Appendix Table S2. Data collection and structure quality indicators.** In addition, baseplate composite map and structure (EMDB-19256, PDB-8RK3) and capsid-neck composite map and structure (EMDB-19439, PDB-8RQE) have been deposited.

|                                             | Capsid virion              | Capsid empty particle | Capsid virion           | Capsid empty particle  | Capsid virion           | Capsid virion with mCP | Capsid virion with mCP           | Capsid virion with mCP           | Capsid – connector mCP           | Connector virion        | Connector empty particle            |
|---------------------------------------------|----------------------------|-----------------------|-------------------------|------------------------|-------------------------|------------------------|----------------------------------|----------------------------------|----------------------------------|-------------------------|-------------------------------------|
| Dataset number                              | 2                          | 2                     | 2                       | 2                      | 2                       | 1                      | 1                                | 1                                | 1                                | 2                       | 2                                   |
| Detector                                    | K3                         | K3                    | K3                      | K3                     | K3                      | K2                     | K2                               | K2                               | K2                               | K3                      | K3                                  |
| Magnification                               | 105 000                    | 105 000               | 105 000                 | 105 000                | 105 000                 | 130 000                | 130 000                          | 130 000                          | 130 000                          | 105 000                 | 105 000                             |
| Voltage (kV)                                | 300                        | 300                   | 300                     | 300                    | 300                     | 300                    | 300                              | 300                              | 300                              | 300                     | 300                                 |
| Exposure (e <sup>-</sup> ·Å <sup>-2</sup> ) | 34                         | 34                    | 34                      | 34                     | 34                      | 30                     | 30                               | 30                               | 30                               | 34                      | 34                                  |
| Pixel size (Å)                              | 0.8336                     | 0.8336                | 0.8336                  | 0.8336                 | 0.8336                  | 1.04                   | 1.04                             | 1.04                             | 1.04                             | 0.8336                  | 0.8336                              |
| Symmetry                                    | I4                         | I4                    | C5                      | C5                     | C1                      | I4                     | C5                               | C1                               | C1                               | C12                     | C12                                 |
| Initial number of particles                 | 5 167                      | 3 037                 | 5 167                   | 3 037                  | 3 567                   | 13 129                 | 5 360                            | 2 913                            | 5 360                            | 4 713                   | 2 666                               |
| Final number of particles                   | 4 713                      | 2 666                 | 3 567                   | 1 878                  | 1 990                   | 5 360                  | 2 913                            | 1 364                            | 2 913                            | 2 076                   | 1 142                               |
| Initial model                               | <i>de novo</i>             | <i>de novo</i>        | I4 map of virion capsid | I4 map of empty capsid | C5 map of virion capsid | <i>de novo</i>         | I4 map of virion capsid with mCP | C5 map of virion capsid with mCP | I4 map of virion capsid with mCP | C5 map of virion capsid | C5 map of empty particle capsid     |
| Map resolution (Å)                          | 2.57                       | 2.58                  | 3.37                    | 3.52                   | 4.93                    | 2.95                   | 4.60                             | 18.59                            | 7.61                             | 3.12                    | 3.28                                |
| FSC threshold                               | 0.143                      | 0.143                 | 0.143                   | 0.143                  | 0.143                   | 0.143                  | 0.143                            | 0.143                            | 0.143                            | 0.143                   | 0.143                               |
| B-factor for map sharpening                 | 34.6                       | 5.8                   | -45.0                   | 0.0                    | -80.0                   | -83.8                  | -81.0                            | -80                              | -77.3                            | -64.8                   | -56.0                               |
| <b>EMDB</b>                                 | 19280                      | 19281                 | 19274                   | 19273                  | 19272                   | 19270                  | 19271                            | 19269                            | 19268                            | 19267                   | 19266                               |
| <b>PDB</b>                                  | 8RKN                       | 8RKO                  | /                       | /                      | /                       | 8RKC                   | /                                | /                                | /                                | 8RKB                    | 8RKA                                |
| <b>EMPIAR</b>                               | 12062                      | 12062                 | 12062                   | 12062                  | 12062                   | 12061                  | 12061                            | 12061                            | 12061                            | 12062                   | 12062                               |
|                                             | Stopper                    | Tail                  | Baseplate               | Baseplate core         | Baseplate               | Tail fibres            | Receptor binding protein         | Procapsid                        | Procapsid                        | Procapsid portal        | Baseplate attached to type IV pilus |
| Dataset number                              | 2                          | 2                     | 2                       | 2                      | 2                       | 2                      | 2                                | 3                                | 3                                | 3                       | 4                                   |
| Detector                                    | K3                         | K3                    | K3                      | K3                     | K3                      | K3                     | K3                               | K2                               | K2                               | K2                      | K3                                  |
| Magnification                               | 105 000                    | 105 000               | 105 000                 | 105 000                | 105 000                 | 105 000                | 105 000                          | 130 000                          | 130 000                          | 130 000                 | 42 000                              |
| Voltage (kV)                                | 300                        | 300                   | 300                     | 300                    | 300                     | 300                    | 300                              | 300                              | 300                              | 300                     | 300                                 |
| Exposure (e <sup>-</sup> ·Å <sup>-2</sup> ) | 34                         | 34                    | 34                      | 34                     | 34                      | 34                     | 34                               | 30                               | 30                               | 30                      | 22.4                                |
| Pixel size (Å)                              | 0.8336                     | 0.8336                | 0.8336                  | 0.8336                 | 0.8336                  | 0.8336                 | 0.8336                           | 1.057                            | 1.057                            | 1.057                   | 2.2                                 |
| Symmetry                                    | C6                         | C6                    | C3                      | C3                     | C1                      | C1                     | C3                               | I4                               | C5                               | C12                     | C1                                  |
| Initial number of particles                 | 3 570                      | 1 780                 | 8 376                   | 8 376                  | 8 376                   | 5 337                  | 5 340                            | 783                              | 783                              | 404                     | 703                                 |
| Final number of particles                   | 3 559                      | 1 759                 | 1 780                   | 1 780                  | 1 780                   | 3 927                  | 4 088                            | 404                              | 426                              | 157                     | 603                                 |
| Initial model                               | <i>C6 map of connector</i> | C3 map of baseplate   | <i>de novo</i>          | C3 map of baseplate    | C3 map of baseplate     | C3 map of baseplate    | C3 map of baseplate              | <i>de novo</i>                   | <i>de novo</i>                   | C5 map of procapsid     | C1 map of baseplate                 |
| Map resolution (Å)                          | 3.65                       | 3.88                  | 4.46                    | 3.60                   | 9.00                    | 4.54                   | 4.74                             | 4.01                             | 6.92                             | 8.33                    | 26                                  |
| FSC threshold                               | 0.143                      | 0.143                 | 0.143                   | 0.143                  | 0.143                   | 0.143                  | 0.143                            | 0.143                            | 0.143                            | 0.143                   | 0.143                               |
| B-factor for map sharpening                 | -71.2                      | -111.9                | -74.9                   | -72.6                  | 0                       | -80                    | -90                              | -4.9                             | -108.5                           | 0                       | 0                                   |
| <b>EMDB</b>                                 | 19265                      | 19264                 | 19263                   | 19262                  | 19261                   | 19260                  | 19259                            | 19285                            | 19258                            | 19257                   | 19561                               |
| <b>PDB</b>                                  | 8RK9                       | 8RK8                  | 8RK7                    | 8RK6                   | /                       | 8RK5                   | 8RK4                             | 8RKX                             | /                                | /                       | /                                   |
| <b>EMPIAR</b>                               | 12062                      | 12062                 | 12062                   | 12062                  | 12062                   | 12062                  | 12062                            | 12063                            | 12063                            | 12063                   | 12064                               |

Appendix Table S3. Homologues of selected JBD30 structural proteins.

| JBD30 protein |                                       | No. of residues available for alignment / No. of residues in protein | protein homologue                              | No. of residues available for alignment / No. of residues in protein | RMSD [Å] | % of residues used in alignment |
|---------------|---------------------------------------|----------------------------------------------------------------------|------------------------------------------------|----------------------------------------------------------------------|----------|---------------------------------|
| <i>gp38</i>   | hexamer forming major capsid protein  | 303/304                                                              | pentamer forming major capsid protein          | 303/304                                                              | 0.659    | 89                              |
| <i>gp42</i>   | stopper protein                       | 139/157                                                              | <i>Rhodobacter capsulatus</i> GTA PDB-6te9-F   | 112/112                                                              | 2.840    | 22                              |
| <i>gp42</i>   | stopper protein                       | 139/157                                                              | bacteriophage SPP1 <i>gp17</i> PDB-2lfp        | 139/139                                                              | 3.307    | 27                              |
| <i>gp42</i>   | stopper protein                       | 139/157                                                              | bacteriophage $\lambda$ <i>gpU</i> PDB-3fz2    | 134/134                                                              | 2.101    | 12                              |
| <i>gp46</i>   | tape measure protein C-terminus       | 32/1,158                                                             | bacteriophage T5 PDB-7zqb                      | 35/1,219                                                             | 1.067    | 48                              |
| <i>gp46</i>   | tape measure protein C-terminus       | 32/1,158                                                             | bacteriophage 80 $\alpha$ PDB-6v8i             | 20/1,154                                                             | 0.353    | 70                              |
| <i>gp47</i>   | tail fibre protein <i>gp47</i>        | 317/318                                                              | JBD30 tail fibre protein <i>gp48</i>           | 305/307                                                              | 1.777    | 38                              |
| <i>gp49</i>   | distal tail protein domain III        | 111/567                                                              | JBD30 distal tail protein domain IV            | 120/567                                                              | 1.892    | 85                              |
| <i>gp50</i>   | upper baseplate protein domain I      | 127/273                                                              | bacteriophage T5 baseplate hub protein HDI     | 158/949                                                              | 0.896    | 34                              |
| <i>gp53</i>   | baseplate hub protein domain II       | 123/735                                                              | bacteriophage T5 baseplate hub protein HDII    | 132/949                                                              | 1.844    | 28                              |
| <i>gp53</i>   | baseplate hub protein domain III      | 69/735                                                               | bacteriophage T5 baseplate hub protein HDIII   | 72/949                                                               | 1.034    | 81                              |
| <i>gp53</i>   | baseplate hub protein domain IV       | 78/735                                                               | bacteriophage T5 baseplate hub protein HDIV    | 64/949                                                               | 1.106    | 77                              |
| <i>gp53</i>   | baseplate hub protein domain V        | 116/735                                                              | bacteriophage T5 baseplate hub protein FNIII-1 | 92/949                                                               | 2.782    | 77                              |
| <i>gp53</i>   | baseplate hub protein domain VII      | 125/735                                                              | bacteriophage T5 baseplate hub protein FNIII-2 | 113/949                                                              | 1.864    | 80                              |
| <i>gp54</i>   | receptor binding protein thigh domain | 117/382                                                              | bacteriophage vB_ApiP_P1 tail spike PDB-6e1r   | 554/554                                                              | 3.221    | 15                              |
| <i>gp54</i>   | receptor binding protein thigh domain | 117/382                                                              | bacteriophage CBA120 tail spike PDB-6nw9       | 633/633                                                              | 3.749    | 10                              |
| <i>gp54</i>   | receptor binding protein thigh domain | 117/382                                                              | bacteriophage T7 tail fibre PDB-7ey9           | 553/553                                                              | 3.348    | 16                              |

\*
